# Supplementary material
Source: PubMed Central journal article supplement (PMC7275721)
Supplement: pnas.2002269117.sapp.pdf [file pnas.2002269117.sapp.pdf]

# PNAS

[www.pnas.org](http://www.pnas.org)

Supplementary Information for

Analyses of Australian fires highlight the need for new fire, resource and conservation policies

David B. Lindenmayer and Chris Taylor

Email: [david.lindenmayer@anu.edu.au](mailto:david.lindenmayer@anu.edu.au)

**This PDF file includes:**

Figures S1 to S2

Tables S1 to S4

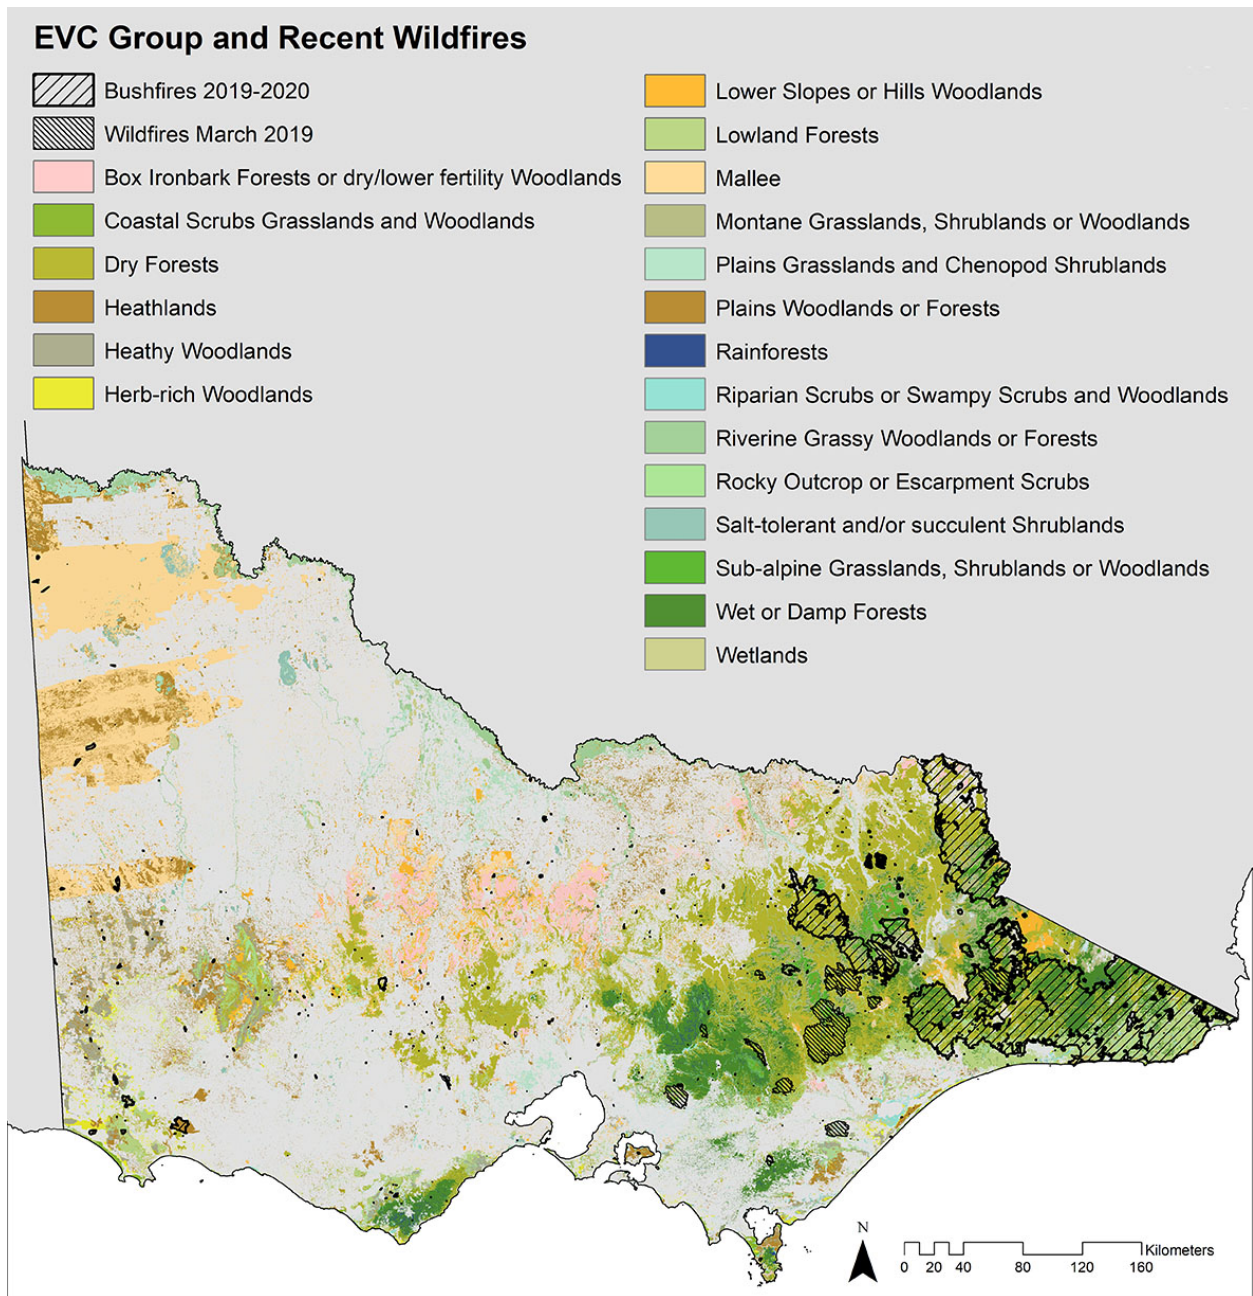

**Fig. S1.** EVC Groups and areas burned during wildfire seasons 2018-2019 and 2019-2020.

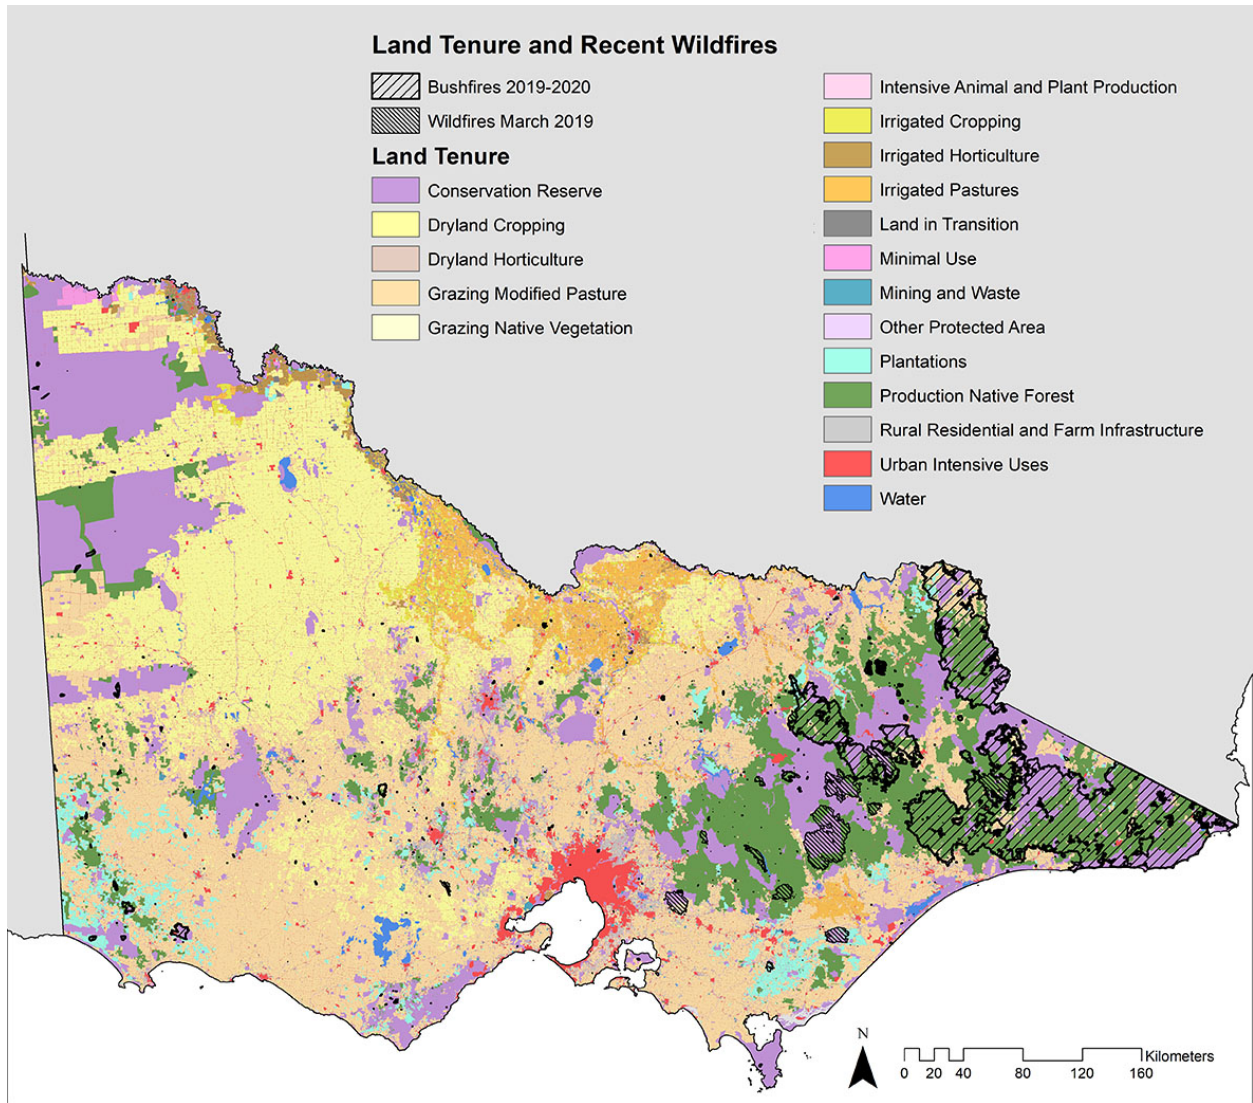

**Fig. S2.** ACLUMP land tenure and areas burned during wildfire seasons 2018-2019 and 2019-2020.

**Table S1.** Tukey's HSD test for annual area burned between periods 1950-2002 and 2003-2020 (P < 0.05)

| Land Tenure           | diff      | lwr       | upr       | p adj     |
|-----------------------|-----------|-----------|-----------|-----------|
| Conservation Reserves | -87694.41 | -147250.8 | -28138    | 0.0044948 |
| Production Forests    | -125670.6 | -203256.5 | -48084.72 | 0.0018897 |
| All Land Tenure       | -235415.4 | -379753.1 | -91077.65 | 0.0017651 |

**Table S2.** Number of fires between 1995-2020 across areas burned during wildfire seasons 2018-2019 and 2019-2020

|         | Area (ha) Burnt<br>2018-2019 | % of Total | Area (ha) Burnt<br>2019-2020 | % of Total |
|---------|------------------------------|------------|------------------------------|------------|
| Burnt 1 | 61,956                       | 29%        | 792,198                      | 52%        |
| Burnt 2 | 126,568                      | 60%        | 600,109                      | 40%        |
| Burnt 3 | 22,325                       | 11%        | 112,957                      | 7%         |
| Burnt 4 | 843                          | 0%         | 3,291                        | 0%         |
| Burnt 5 | 0                            | 0%         | 455                          | 0%         |
| Total   | 211,691                      | 100%       | 1,509,009                    | 100%       |

**Table S3.** Frequency of fire for areas burned for the EVC Groups

| <b>EVC Group</b>                                      | <b>Unburnt<br/>(ha)</b> | <b>Burnt 1<br/>(ha)</b> | <b>Burnt 2<br/>(ha)</b> | <b>Burnt 3<br/>(ha)</b> | <b>Burnt 4<br/>(ha)</b> | <b>Burnt 5<br/>(ha)</b> | <b>Total (ha)</b> | <b>% of<br/>Total<br/>burnt</b> |
|-------------------------------------------------------|-------------------------|-------------------------|-------------------------|-------------------------|-------------------------|-------------------------|-------------------|---------------------------------|
| Box Ironbark Forests or dry/lower fertility Woodlands | 344,350                 | 16,991                  | 3,189                   | 17                      | -                       | -                       | 364,548           | 6%                              |
| Coastal Scrubs Grasslands and Woodlands               | 46,541                  | 5,349                   | 60                      | -                       | -                       | -                       | 51,950            | 10%                             |
| Dry Forests                                           | 1,155,714               | 1,057,748               | 417,723                 | 82,575                  | 2,291                   | 322                     | 2,716,372         | 57%                             |
| Heathlands                                            | 137,729                 | 128,711                 | 12,658                  | 919                     | 1                       | -                       | 280,017           | 51%                             |
| Heathy Woodlands                                      | 242,451                 | 85,617                  | 11,019                  | 422                     | -                       | -                       | 339,509           | 29%                             |
| Herb-rich Woodlands                                   | 152,902                 | 16,074                  | 1,523                   | 4                       | -                       | -                       | 170,502           | 10%                             |
| Lower Slopes or Hills Woodlands                       | 352,786                 | 54,387                  | 8,545                   | 648                     | -                       | -                       | 416,365           | 15%                             |
| Lowland Forests                                       | 280,177                 | 289,971                 | 45,307                  | 773                     | 45                      | -                       | 616,271           | 55%                             |
| Mallee                                                | 1,164,431               | 387,377                 | 10,413                  | 236                     | -                       | -                       | 1,562,456         | 25%                             |
| Montane Grasslands, Shrublands or Woodlands           | 44,808                  | 208,294                 | 136,522                 | 26,980                  | 934                     | -                       | 417,538           | 89%                             |
| Plains Grasslands and Chenopod Shrublands             | 233,666                 | 3,768                   | 10                      | 2                       | -                       | -                       | 237,446           | 2%                              |
| Plains Woodlands or Forests                           | 790,463                 | 57,465                  | 1,823                   | 98                      | -                       | -                       | 849,849           | 7%                              |
| Rainforests                                           | 20,869                  | 15,322                  | 1,956                   | 21                      | -                       | -                       | 38,168            | 45%                             |
| Riparian Scrubs or Swampy Scrubs and Woodlands        | 164,404                 | 75,787                  | 16,172                  | 1,919                   | 89                      | -                       | 258,370           | 36%                             |
| Riverine Grassy Woodlands or Forests                  | 397,620                 | 11,114                  | 784                     | 10                      | 1                       | -                       | 409,529           | 3%                              |
| Rocky Outcrop or Escarpment Scrubs                    | 17,529                  | 41,413                  | 15,096                  | 741                     | 9                       | -                       | 74,787            | 77%                             |
| Salt-tolerant and/or succulent Shrublands             | 90,640                  | 501                     | 2                       | -                       | -                       | -                       | 91,143            | 1%                              |
| Sub-alpine Grasslands, Shrublands or Woodlands        | 11,973                  | 64,681                  | 39,438                  | 10,344                  | 369                     | -                       | 126,805           | 91%                             |
| Wet or Damp Forests                                   | 453,996                 | 562,436                 | 264,704                 | 26,901                  | 409                     | 133                     | 1,308,579         | 65%                             |
| Wetlands                                              | 144,399                 | 9,916                   | 382                     | 64                      | 3                       | -                       | 154,763           | 7%                              |
| <b>Total</b>                                          | <b>6,247,447</b>        | <b>3,092,919</b>        | <b>987,324</b>          | <b>152,672</b>          | <b>4,150</b>            | <b>455</b>              | <b>10,484,965</b> | <b>40%</b>                      |

**Table S4.** Frequency of fire for areas burned for ACLUMP Land Tenure

| <b>ACLUMP Category</b>                    | <b>Unburnt (ha)</b> | <b>Burnt 1 (ha)</b> | <b>Burnt 2 (ha)</b> | <b>Burnt 3 (ha)</b> | <b>Burnt 4 (ha)</b> | <b>Burnt 5 (ha)</b> | <b>Total (ha)</b> | <b>% of total burnt</b> |
|-------------------------------------------|---------------------|---------------------|---------------------|---------------------|---------------------|---------------------|-------------------|-------------------------|
| Production Native Forest                  | 1,213,974           | 1,433,326           | 522,178             | 82,531              | 2,224               | 455                 | 3,254,688         | 63%                     |
| Conservation Reserve                      | 2,374,642           | 1,348,171           | 435,943             | 68,088              | 1,912               | -                   | 4,228,756         | 44%                     |
| Other Protected Area                      | 4                   | -                   | -                   | -                   | -                   | -                   | 4                 | 0%                      |
| Dryland Cropping                          | 4,558,764           | 36,374              | 584                 | 5                   | -                   | -                   | 4,595,726         | 1%                      |
| Urban Intensive Uses                      | 1,004,259           | 52,876              | 6,045               | 244                 | 2                   | -                   | 1,063,425         | 6%                      |
| Dryland Horticulture                      | 69,918              | 6,094               | 316                 | -                   | -                   | -                   | 76,328            | 8%                      |
| Irrigated Horticulture                    | 133,138             | 429                 | 14                  | 6                   | -                   | -                   | 133,586           | 0%                      |
| Grazing Native Vegetation                 | 13,573              | 1,547               | 467                 | -                   | -                   | -                   | 15,587            | 13%                     |
| Water                                     | 194,375             | 4,001               | 48                  | 2                   | -                   | -                   | 198,426           | 2%                      |
| Grazing Modified Pasture                  | 6,425,491           | 455,971             | 27,507              | 1,037               | 2                   | -                   | 6,910,008         | 7%                      |
| Land in Transition                        | 43,819              | 2,725               | 73                  | 2                   | -                   | -                   | 46,619            | 6%                      |
| Irrigated Pastures                        | 704,098             | 3,724               | 66                  | -                   | -                   | -                   | 707,888           | 1%                      |
| Irrigated Cropping                        | 203,329             | 1,800               | 5                   | -                   | -                   | -                   | 205,135           | 1%                      |
| Rural Residential and Farm Infrastructure | 547,003             | 35,195              | 1,493               | 314                 | 3                   | -                   | 584,008           | 6%                      |
| Minimal Use                               | 62,920              | 6,444               | 510                 | 883                 | 7                   | -                   | 70,764            | 11%                     |
| Plantations                               | 526,631             | 70,199              | 1,975               | 2                   | -                   | -                   | 598,808           | 12%                     |
| Intensive Animal and Plant Production     | 47,376              | 1,439               | 2                   | -                   | -                   | -                   | 48,818            | 3%                      |
| Mining and Waste                          | 42,944              | 1,799               | 22                  | -                   | -                   | -                   | 44,766            | 4%                      |
| <b>Total</b>                              | <b>18,166,258</b>   | <b>3,462,111</b>    | <b>997,248</b>      | <b>153,114</b>      | <b>4,150</b>        | <b>455</b>          | <b>22,783,335</b> | <b>20%</b>              |
